# Supplementary material for: Hawaiian Treeline Ecotones: Implications for Plant Community Conservation under Climate Change
Source: MDPI journal article supplement (doi:10.3390/plants13010123), 2023-12-31
Supplement: s1 [file s1]

# Supplementary material for “Hawaiian treeline ecotones: Implications for plant community conservation under climate change”

Alison Ainsworth<sup>1,2,\*</sup> and Donald R. Drake<sup>1</sup>

<sup>1</sup> School of Life Sciences, University of Hawai‘i at Mānoa, Honolulu, HI 96822, USA; dondrake@hawaii.edu.

<sup>2</sup> National Park Service, Pacific Island Inventory and Monitoring Network, Hawaii National Park, HI 96718, USA.

\* Correspondence: [alison\\_ainsworth@nps.gov](mailto:alison_ainsworth@nps.gov); current address: National Park Service, Pacific West Region, School of Environmental and Forest Sciences, University of Washington, Seattle, WA, 98195, USA.

**S1. Vegetation data conversion.** The majority of plots (75%) used in analysis were installed in relatively homogenous vegetated areas (> 5 % cover) for vascular plant inventories and classification of plant communities (Green et al. 2015a, Green et al. 2015b). Plant species presence and abundance were recorded as foliar absolute cover relevé estimates (Mueller-Dombois and Ellenberg 1974).

The second data set contained 57 rectangular plots (1000 m<sup>2</sup>) installed in wet forests, subalpine shrublands, and subalpine woodlands to assess status and detect long-term trends within upland plant communities (Ainsworth et al. 2011). Plant species presence and abundance were recorded using modified Whittaker nested plots (Ainsworth et al. 2011). Species presence and tree density data were converted to absolute cover to enable comparisons with the vascular plant inventory data. For all 57 plots, if species were identified as present in the plot according to the presence / absence data, but were not encountered along the understory (< 2 m) pole intercept transect lines then that species was added to the plot with a cover value of 0.33 %.

For 17 of the 57 plots (mostly WF plots), tree individuals were present in the plots, > 2 m tall, and recorded by diameter at breast height (DBH) as opposed to absolute cover. In order to convert these tree density measures into comparable absolute cover values the following conservative conversions were used per species per plot: (1) < 5 large trees (≥ 10 cm DBH), the number of trees was used as the percent cover value, (2) 5 – 80 large trees, the number of trees was rounded down to the closest 5 % for cover value, and (3) > 80 large trees, cover was recorded as 80 %. These conversions were generated after intensive qualitative review of each plot’s GIS aerial imagery, sample plot photos, plot tree height data, and by comparing values with nearby mapping plots to ensure consistency across sampling methodologies.

At the time of this analysis, adequate allometric equations to convert DBH to canopy cover values were not available. Conversions have been developed to convert DBH and/or basal diameter and height to aboveground biomass for *Metrosideros* and others, but even these caution against widespread application due to these species wide climatic distributions (Aplet and Vitousek 1994, Litton and Kauffman 2008). For the purposes of this large-scale coarse assessment, we are confident that our conservative conversion from plot tree density values to cover class estimates warrants the inclusion of these 17 plots in the full data set.

**S2. Environmental condition.** Site specific data for 225 sample plots used to assess vegetation patterns across Hawaiian treeline ecotones are included (Wagner et al. 1999, Palmer 2003, Wagner et al. 2012, Giambelluca et al. 2013, Giambelluca et al. 2014). Site location data consist of volcano (**Vol**), Mauna Loa (ML) or Haleakalā (H), geographic latitude (**Lat**) and longitude (**Long**), and elevation (**EL**; m). Environmental data include mean annual temperature (**MAT**; °C), minimum and maximum temperature (**T**; °C), mean annual precipitation (**MAP**; mm), Penman-Montieth modeled potential evapotranspiration (**PET**; mm), aridity index (**AI**) calculated as MAP/PET, transpiration (**TR**; mm), wet-canopy evaporation (**WCE**; mm), soil evaporation (**SE**; mm), and evapotranspiration (**ET**; mm). Sample sites range from soil age (**SA**) less than 400 years old on Hawai'i to over one million years old on Maui (1 = <750; 2 = 750<1500; 3 = 1500<3000; 4 = 3000<5000; 5 = 5000<13000; 6 = 13000<30000; 7 = 30000<50000; 8 = >140000) including five categories of lithology (**Lith**)(1 = aa; 2 = pahoehoe; 3 = aa+pahoehoe; 4 = sand+cobbles; 5 = tephra fallout+ash). Additional site data include sample plot size (**Size**; m<sup>2</sup>), tree life form greater than three meters in height (**Tree**) by category (0 = treeless; 1 = <10% tree cover; 2 = ≥10% tree cover), and the community type (**Com**) each plot was assigned to using vegetation-based cluster analysis (SS = Subalpine Shrubland; SW = Subalpine Woodland; WF = Wet Forest).

| Site   | Vol | Lat     | Long      | EL   | MAT   | Tmin | Tmax  | MAP | PET  | AI   | TR | WCE | SE  | ET  | SA | Lith | Size | Tree | Com |
|--------|-----|---------|-----------|------|-------|------|-------|-----|------|------|----|-----|-----|-----|----|------|------|------|-----|
| H.004K | ML  | 19.2446 | -155.7931 | 1711 | 12.48 | 8.16 | 18.19 | 846 | 1719 | 0.49 | 4  | 173 | 240 | 417 | 3  | 3    | 700  | 2    | SW  |
| H.005K | ML  | 19.2457 | -155.7911 | 1739 | 12.39 | 7.83 | 17.93 | 846 | 1288 | 0.66 | 58 | 199 | 210 | 467 | 3  | 3    | 700  | 2    | SS  |
| H.006K | ML  | 19.2463 | -155.7903 | 1751 | 12.22 | 7.64 | 17.77 | 855 | 1300 | 0.66 | 27 | 144 | 271 | 441 | 3  | 3    | 700  | 2    | SS  |
| H.007K | ML  | 19.2480 | -155.7870 | 1810 | 11.89 | 7.28 | 17.47 | 863 | 1338 | 0.65 | 2  | 66  | 361 | 428 | 3  | 3    | 700  | 1    | SS  |
| H.008K | ML  | 19.2499 | -155.7834 | 1858 | 11.52 | 6.87 | 17.14 | 882 | 1390 | 0.63 | 11 | 97  | 336 | 444 | 3  | 3    | 700  | 2    | SS  |
| H.009K | ML  | 19.2509 | -155.7816 | 1878 | 11.52 | 6.71 | 17.01 | 882 | 1390 | 0.63 | 11 | 97  | 336 | 444 | 3  | 3    | 700  | 0    | SS  |
| H.010K | ML  | 19.2477 | -155.7803 | 1880 | 11.41 | 6.76 | 17.05 | 894 | 1206 | 0.74 | 1  | 49  | 322 | 372 | 3  | 3    | 700  | 0    | SS  |
| H.012K | ML  | 19.2381 | -155.7845 | 1763 | 12.26 | 7.68 | 17.80 | 872 | 1318 | 0.66 | 93 | 246 | 171 | 510 | 3  | 3    | 700  | 2    | SW  |
| H.013K | ML  | 19.2378 | -155.7848 | 1758 | 12.26 | 7.68 | 17.80 | 872 | 1318 | 0.66 | 93 | 246 | 171 | 510 | 3  | 3    | 700  | 2    | SW  |
| H.014K | ML  | 19.2409 | -155.7853 | 1777 | 12.00 | 7.40 | 17.57 | 874 | 1951 | 0.45 | 13 | 275 | 172 | 460 | 3  | 3    | 700  | 2    | SW  |
| H.015K | ML  | 19.2397 | -155.7884 | 1736 | 12.35 | 7.78 | 17.88 | 864 | 1912 | 0.45 | 13 | 285 | 184 | 481 | 3  | 3    | 700  | 2    | SW  |
| H.016K | ML  | 19.2404 | -155.7872 | 1748 | 12.35 | 7.78 | 17.88 | 864 | 1912 | 0.45 | 13 | 285 | 184 | 481 | 3  | 3    | 700  | 2    | SS  |
| H.017K | ML  | 19.2419 | -155.7842 | 1800 | 11.87 | 7.40 | 17.57 | 884 | 1959 | 0.45 | 13 | 265 | 182 | 459 | 3  | 3    | 700  | 2    | SS  |
| H.018K | ML  | 19.2435 | -155.7813 | 1839 | 11.60 | 6.96 | 17.21 | 895 | 1979 | 0.45 | 16 | 275 | 185 | 476 | 3  | 3    | 700  | 0    | SS  |
| H.019K | ML  | 19.2468 | -155.7774 | 1902 | 11.27 | 6.67 | 16.98 | 916 | 1449 | 0.63 | 18 | 131 | 314 | 462 | 3  | 3    | 700  | 0    | SS  |
| H.020K | ML  | 19.2368 | -155.7858 | 1737 | 12.26 | 7.68 | 17.80 | 872 | 1318 | 0.66 | 93 | 246 | 171 | 510 | 3  | 3    | 700  | 2    | SW  |
| H.021K | ML  | 19.2385 | -155.7838 | 1777 | 12.15 | 7.34 | 17.52 | 882 | 1906 | 0.46 | 11 | 258 | 207 | 476 | 3  | 3    | 700  | 2    | SW  |
| H.022K | ML  | 19.2334 | -155.7824 | 1743 | 12.35 | 7.78 | 17.88 | 877 | 1325 | 0.66 | 95 | 251 | 170 | 516 | 3  | 3    | 700  | 2    | SW  |
| H.023K | ML  | 19.2338 | -155.7817 | 1759 | 12.25 | 7.47 | 17.62 | 880 | 1600 | 0.55 | 2  | 111 | 329 | 441 | 3  | 3    | 700  | 0    | SS  |
| H.024K | ML  | 19.2357 | -155.7785 | 1807 | 11.94 | 7.32 | 17.51 | 901 | 1526 | 0.59 | 5  | 135 | 292 | 431 | 3  | 3    | 700  | 0    | SS  |
| H.025K | ML  | 19.2383 | -155.7745 | 1882 | 11.45 | 6.71 | 17.00 | 927 | 1481 | 0.63 | 5  | 116 | 317 | 438 | 3  | 3    | 700  | 0    | SS  |
| H.026K | ML  | 19.2395 | -155.7722 | 1909 | 11.23 | 6.55 | 16.87 | 940 | 1879 | 0.50 | 3  | 154 | 335 | 492 | 3  | 3    | 700  | 0    | SS  |
| H.027K | ML  | 19.2423 | -155.7678 | 1968 | 10.87 | 6.15 | 16.55 | 964 | 2079 | 0.46 | 5  | 161 | 347 | 512 | 3  | 3    | 700  | 0    | SS  |
| H.028K | ML  | 19.4009 | -155.7454 | 2189 | 9.74  | 4.92 | 15.62 | 709 | 2292 | 0.31 | 4  | 122 | 261 | 386 | 3  | 3    | 700  | 0    | SW  |
| H.029K | ML  | 19.4042 | -155.7450 | 2183 | 9.78  | 4.96 | 15.67 | 706 | 2324 | 0.30 | 4  | 126 | 259 | 388 | 3  | 3    | 700  | 2    | SW  |

| Site   | Vol | Lat     | Long      | EL   | MAT   | Tmin | Tmax  | MAP  | PET  | AI   | TR  | WCE | SE  | ET  | SA | Lith | Size | Tree | Com |
|--------|-----|---------|-----------|------|-------|------|-------|------|------|------|-----|-----|-----|-----|----|------|------|------|-----|
| H.030K | ML  | 19.3883 | -155.7351 | 2332 | 9.37  | 4.61 | 15.16 | 738  | 1643 | 0.45 | 3   | 48  | 318 | 369 | 3  | 3    | 700  | 1    | SW  |
| H.031K | ML  | 19.2290 | -155.6273 | 1860 | 11.68 | 6.99 | 17.22 | 2218 | 2384 | 0.93 | 29  | 356 | 251 | 635 | 1  | 3    | 700  | 0    | SS  |
| H.032K | ML  | 19.2550 | -155.7828 | 1880 | 11.45 | 6.80 | 17.08 | 880  | 1335 | 0.66 | 40  | 150 | 248 | 438 | 1  | 3    | 700  | 0    | SS  |
| H.033K | ML  | 19.2567 | -155.7651 | 2053 | 10.33 | 5.55 | 16.07 | 962  | 1418 | 0.68 | 0   | 19  | 420 | 438 | 1  | 3    | 700  | 0    | SS  |
| H.034K | ML  | 19.2560 | -155.7764 | 1936 | 11.08 | 6.38 | 16.75 | 910  | 1272 | 0.72 | 0   | 23  | 374 | 397 | 1  | 3    | 700  | 0    | SS  |
| H.037K | ML  | 19.2221 | -155.6227 | 1799 | 12.07 | 7.42 | 17.56 | 2308 | 2243 | 1.03 | 80  | 350 | 254 | 684 | 1  | 3    | 700  | 2    | WF  |
| H.038K | ML  | 19.2227 | -155.6235 | 1808 | 12.04 | 7.39 | 17.54 | 2286 | 2181 | 1.05 | 54  | 380 | 203 | 637 | 1  | 3    | 700  | 2    | SS  |
| H.039K | ML  | 19.2236 | -155.6247 | 1818 | 11.93 | 7.27 | 17.44 | 2273 | 2409 | 0.94 | 36  | 382 | 229 | 647 | 1  | 3    | 700  | 2    | SS  |
| H.040K | ML  | 19.2241 | -155.6255 | 1818 | 11.93 | 7.27 | 17.44 | 2273 | 2409 | 0.94 | 36  | 382 | 229 | 647 | 1  | 3    | 700  | 2    | SS  |
| H.041K | ML  | 19.2269 | -155.6292 | 1852 | 11.73 | 7.04 | 17.26 | 2225 | 2475 | 0.90 | 22  | 337 | 295 | 653 | 3  | 3    | 700  | 2    | WF  |
| H.042K | ML  | 19.2296 | -155.6334 | 1880 | 11.47 | 6.73 | 17.01 | 2171 | 2277 | 0.95 | 26  | 303 | 281 | 610 | 3  | 3    | 700  | 2    | WF  |
| H.043K | ML  | 19.2650 | -155.5888 | 1931 | 11.29 | 6.59 | 16.92 | 2120 | 2209 | 0.96 | 33  | 316 | 252 | 600 | 3  | 3    | 700  | 2    | WF  |
| H.044K | ML  | 19.2647 | -155.5878 | 1920 | 11.39 | 6.70 | 17.01 | 2139 | 2191 | 0.98 | 31  | 326 | 240 | 597 | 3  | 3    | 700  | 2    | SS  |
| H.045K | ML  | 19.2596 | -155.5812 | 1815 | 12.03 | 7.40 | 17.57 | 2240 | 1978 | 1.13 | 46  | 350 | 205 | 601 | 3  | 3    | 700  | 2    | SS  |
| H.046K | ML  | 19.2658 | -155.5899 | 1939 | 11.14 | 6.42 | 16.78 | 2099 | 2243 | 0.94 | 33  | 320 | 246 | 598 | 3  | 3    | 700  | 1    | SS  |
| H.047K | ML  | 19.2687 | -155.5939 | 1997 | 10.75 | 5.99 | 16.43 | 2039 | 1551 | 1.31 | 3   | 120 | 494 | 616 | 3  | 3    | 700  | 0    | SS  |
| H.048K | ML  | 19.2716 | -155.5978 | 2048 | 10.43 | 5.64 | 16.15 | 1982 | 1570 | 1.26 | 3   | 109 | 505 | 617 | 2  | 3    | 700  | 0    | SS  |
| H.050K | ML  | 19.2369 | -155.6426 | 1958 | 10.97 | 6.22 | 16.62 | 2061 | 1649 | 1.25 | 3   | 127 | 541 | 670 | 2  | 3    | 700  | 0    | SS  |
| H.051K | ML  | 19.2544 | -155.6208 | 2008 | 10.74 | 5.86 | 16.31 | 2026 | 1439 | 1.41 | 0   | 37  | 590 | 626 | 1  | 3    | 700  | 2    | SS  |
| H.052K | ML  | 19.2522 | -155.6178 | 1973 | 10.80 | 6.03 | 16.45 | 2040 | 1568 | 1.30 | 42  | 152 | 428 | 622 | 3  | 3    | 700  | 2    | WF  |
| H.053K | ML  | 19.2468 | -155.6100 | 1893 | 11.49 | 6.78 | 17.06 | 2157 | 2219 | 0.97 | 39  | 161 | 224 | 424 | 6  | 5    | 700  | 2    | WF  |
| H.054K | ML  | 19.2450 | -155.6075 | 1877 | 11.68 | 7.00 | 17.23 | 2188 | 2237 | 0.98 | 28  | 332 | 257 | 616 | 3  | 3    | 700  | 1    | SS  |
| H.055K | ML  | 19.2401 | -155.6010 | 1803 | 12.19 | 7.56 | 17.69 | 2254 | 1947 | 1.16 | 112 | 363 | 192 | 667 | 3  | 3    | 700  | 2    | SS  |
| H.057K | ML  | 19.2403 | -155.6011 | 1804 | 12.19 | 7.56 | 17.69 | 2254 | 1947 | 1.16 | 112 | 363 | 192 | 667 | 3  | 3    | 700  | 2    | WF  |
| H.058K | ML  | 19.2403 | -155.6011 | 1804 | 12.19 | 7.56 | 17.69 | 2254 | 1947 | 1.16 | 112 | 363 | 192 | 667 | 3  | 3    | 700  | 2    | SS  |
| H.059K | ML  | 19.2997 | -155.5434 | 1909 | 11.41 | 6.61 | 16.88 | 2073 | 2168 | 0.96 | 20  | 292 | 290 | 602 | 2  | 3    | 700  | 1    | SS  |
| H.060K | ML  | 19.3027 | -155.5472 | 1956 | 11.11 | 6.39 | 16.70 | 2017 | 2223 | 0.91 | 21  | 282 | 284 | 587 | 3  | 3    | 700  | 0    | SS  |
| H.061K | ML  | 19.3054 | -155.5511 | 2019 | 10.65 | 5.89 | 16.30 | 1958 | 1488 | 1.32 | 5   | 111 | 461 | 577 | 3  | 3    | 700  | 2    | SS  |
| H.062K | ML  | 19.3195 | -155.5708 | 2292 | 9.40  | 4.56 | 15.00 | 1661 | 1713 | 0.97 | 1   | 64  | 531 | 596 | 2  | 3    | 700  | 0    | SS  |
| H.063K | ML  | 19.3102 | -155.5581 | 2130 | 10.02 | 5.21 | 15.75 | 1855 | 2094 | 0.89 | 14  | 163 | 411 | 587 | 3  | 3    | 700  | 2    | SS  |
| H.064K | ML  | 19.2814 | -155.6154 | 2193 | 9.71  | 4.84 | 15.42 | 1792 | 1800 | 1.00 | 1   | 83  | 570 | 655 | 2  | 3    | 700  | 0    | SS  |
| H.065K | ML  | 19.2796 | -155.6154 | 2171 | 9.71  | 4.90 | 15.51 | 1792 | 1800 | 1.00 | 1   | 83  | 570 | 655 | 2  | 3    | 700  | 0    | SS  |
| H.066K | ML  | 19.2753 | -155.6033 | 2101 | 10.11 | 5.29 | 15.86 | 1907 | 1691 | 1.13 | 4   | 105 | 518 | 626 | 2  | 3    | 700  | 0    | SS  |
| H.067K | ML  | 19.2776 | -155.6062 | 2130 | 9.96  | 5.13 | 15.73 | 1869 | 1718 | 1.09 | 2   | 92  | 546 | 640 | 2  | 3    | 700  | 0    | SS  |
| H.068K | ML  | 19.2785 | -155.6078 | 2144 | 9.79  | 5.08 | 15.69 | 1831 | 1684 | 1.09 | 2   | 84  | 551 | 636 | 2  | 3    | 700  | 0    | SS  |
| H.072K | ML  | 19.2030 | -155.6429 | 1713 | 12.56 | 7.96 | 18.03 | 2351 | 2236 | 1.05 | 51  | 318 | 312 | 680 | 2  | 3    | 700  | 0    | SS  |
| H.073K | ML  | 19.2046 | -155.6452 | 1735 | 12.44 | 7.83 | 17.92 | 2311 | 2275 | 1.02 | 43  | 382 | 259 | 683 | 2  | 3    | 700  | 2    | WF  |
| H.074K | ML  | 19.2062 | -155.6474 | 1750 | 12.36 | 7.74 | 17.86 | 2290 | 2413 | 0.95 | 25  | 381 | 282 | 687 | 2  | 3    | 700  | 2    | SS  |
| H.075K | ML  | 19.2096 | -155.6519 | 1790 | 12.07 | 7.42 | 17.59 | 2196 | 2322 | 0.95 | 16  | 298 | 375 | 688 | 2  | 3    | 700  | 2    | SS  |
| H.076K | ML  | 19.2790 | -155.5615 | 1897 | 11.26 | 6.57 | 16.86 | 2232 | 2166 | 1.03 | 31  | 319 | 237 | 588 | 6  | 5    | 700  | 0    | SS  |
| H.077K | ML  | 19.2835 | -155.5678 | 1985 | 10.96 | 6.03 | 16.43 | 2166 | 2188 | 0.99 | 30  | 296 | 254 | 581 | 6  | 5    | 700  | 0    | SS  |
| H.078K | ML  | 19.2860 | -155.5716 | 2036 | 10.51 | 5.74 | 16.21 | 2059 | 1481 | 1.39 | 4   | 107 | 484 | 594 | 6  | 5    | 700  | 1    | SS  |

| Site   | Vol | Lat     | Long      | EL   | MAT   | Tmin | Tmax  | MAP  | PET  | AI   | TR  | WCE | SE  | ET  | SA | Lith | Size | Tree | Com |
|--------|-----|---------|-----------|------|-------|------|-------|------|------|------|-----|-----|-----|-----|----|------|------|------|-----|
| H.079K | ML  | 19.2897 | -155.5769 | 2095 | 10.20 | 5.41 | 15.95 | 1983 | 1491 | 1.33 | 1   | 93  | 505 | 599 | 3  | 3    | 700  | 0    | SS  |
| H.092K | ML  | 19.2917 | -155.5790 | 2131 | 9.99  | 5.18 | 15.76 | 1930 | 1834 | 1.05 | 5   | 116 | 483 | 604 | 3  | 3    | 700  | 2    | WF  |
| H.093K | ML  | 19.2945 | -155.5828 | 2165 | 9.77  | 4.94 | 15.56 | 1864 | 1703 | 1.09 | 2   | 88  | 531 | 621 | 3  | 3    | 700  | 2    | SS  |
| H.094K | ML  | 19.2983 | -155.5881 | 2231 | 9.60  | 4.80 | 15.35 | 1778 | 1766 | 1.01 | 1   | 77  | 552 | 629 | 3  | 3    | 700  | 2    | SS  |
| H.095K | ML  | 19.3266 | -155.5336 | 2064 | 10.29 | 5.50 | 15.97 | 1870 | 1748 | 1.07 | 9   | 131 | 417 | 557 | 2  | 3    | 700  | 0    | SS  |
| H.096K | ML  | 19.3326 | -155.5422 | 2203 | 9.60  | 4.83 | 15.38 | 1721 | 1631 | 1.06 | 7   | 89  | 450 | 546 | 3  | 3    | 700  | 2    | SS  |
| H.097K | ML  | 19.3342 | -155.5443 | 2226 | 9.57  | 4.77 | 15.29 | 1701 | 1652 | 1.03 | 6   | 85  | 461 | 552 | 3  | 3    | 700  | 2    | SS  |
| H.098K | ML  | 19.3293 | -155.5375 | 2125 | 9.93  | 5.10 | 15.65 | 1807 | 1824 | 0.99 | 17  | 147 | 363 | 527 | 3  | 3    | 700  | 2    | SS  |
| H.099K | ML  | 19.3313 | -155.5401 | 2170 | 9.72  | 4.89 | 15.46 | 1764 | 2184 | 0.81 | 25  | 182 | 324 | 531 | 3  | 3    | 700  | 0    | SS  |
| H.100K | ML  | 19.3372 | -155.5485 | 2291 | 9.39  | 4.62 | 15.08 | 1635 | 1686 | 0.97 | 2   | 66  | 501 | 569 | 3  | 3    | 700  | 2    | SS  |
| H.101K | ML  | 19.3407 | -155.5535 | 2383 | 9.10  | 4.38 | 14.74 | 1541 | 1735 | 0.89 | 1   | 51  | 518 | 570 | 3  | 3    | 700  | 1    | SS  |
| H.105K | ML  | 19.2009 | -155.6874 | 1795 | 12.07 | 7.41 | 17.61 | 1694 | 1708 | 0.99 | 1   | 141 | 548 | 690 | 3  | 3    | 700  | 0    | SS  |
| H.108K | ML  | 19.2001 | -155.6860 | 1783 | 12.21 | 7.43 | 17.63 | 1691 | 1705 | 0.99 | 1   | 143 | 545 | 688 | 3  | 3    | 700  | 0    | SS  |
| H.135K | ML  | 19.1916 | -155.7613 | 1705 | 12.45 | 7.89 | 17.98 | 970  | 2183 | 0.44 | 17  | 340 | 184 | 541 | 3  | 3    | 700  | 2    | SS  |
| H.136K | ML  | 19.1917 | -155.7565 | 1734 | 12.30 | 7.73 | 17.84 | 1001 | 1510 | 0.66 | 1   | 86  | 365 | 451 | 3  | 3    | 700  | 0    | SS  |
| H.137K | ML  | 19.3785 | -155.7221 | 2498 | 8.85  | 4.17 | 14.53 | 768  | 1508 | 0.51 | 0   | 10  | 383 | 392 | 3  | 3    | 700  | 0    | SS  |
| H.138K | ML  | 19.3775 | -155.7242 | 2463 | 8.97  | 4.27 | 14.67 | 773  | 1628 | 0.47 | 1   | 26  | 377 | 404 | 3  | 3    | 700  | 1    | SS  |
| H.139K | ML  | 19.3775 | -155.7304 | 2392 | 9.12  | 4.46 | 14.94 | 769  | 1649 | 0.47 | 3   | 37  | 365 | 405 | 3  | 3    | 700  | 2    | SW  |
| H.140K | ML  | 19.3780 | -155.7359 | 2346 | 9.32  | 4.56 | 15.09 | 760  | 1636 | 0.46 | 0   | 36  | 360 | 397 | 3  | 3    | 700  | 0    | SS  |
| H.141K | ML  | 19.3793 | -155.7454 | 2249 | 9.57  | 4.77 | 15.39 | 758  | 1661 | 0.46 | 2   | 63  | 326 | 391 | 3  | 3    | 700  | 2    | SS  |
| H.142K | ML  | 19.2129 | -155.7726 | 1701 | 12.65 | 8.03 | 18.09 | 909  | 1922 | 0.47 | 17  | 325 | 173 | 515 | 3  | 3    | 700  | 2    | SS  |
| H.143K | ML  | 19.2130 | -155.7679 | 1761 | 12.23 | 7.64 | 17.77 | 948  | 1999 | 0.44 | 13  | 278 | 206 | 497 | 3  | 3    | 700  | 2    | SS  |
| H.144K | ML  | 19.2130 | -155.7665 | 1775 | 12.06 | 7.64 | 17.77 | 961  | 2008 | 0.44 | 12  | 258 | 225 | 495 | 3  | 3    | 700  | 2    | SS  |
| H.145K | ML  | 19.2130 | -155.7631 | 1815 | 11.86 | 7.24 | 17.43 | 974  | 1782 | 0.44 | 3   | 150 | 360 | 513 | 3  | 3    | 700  | 0    | SS  |
| H.146K | ML  | 19.2131 | -155.7584 | 1874 | 11.53 | 6.88 | 17.14 | 1002 | 1590 | 0.44 | 0   | 64  | 408 | 472 | 3  | 3    | 700  | 0    | SS  |
| H.147K | ML  | 19.4090 | -155.7401 | 2231 | 9.66  | 4.85 | 15.52 | 699  | 1935 | 0.44 | 14  | 120 | 206 | 340 | 3  | 3    | 700  | 1    | SW  |
| H.148K | ML  | 19.4091 | -155.7406 | 2223 | 9.66  | 4.85 | 15.52 | 699  | 1935 | 0.44 | 14  | 120 | 206 | 340 | 3  | 3    | 700  | 0    | SW  |
| H.149K | ML  | 19.4077 | -155.7307 | 2346 | 9.33  | 4.58 | 15.13 | 698  | 1464 | 0.44 | 11  | 43  | 292 | 345 | 3  | 3    | 700  | 1    | SW  |
| H.150K | ML  | 19.4075 | -155.7444 | 2176 | 9.85  | 5.01 | 15.75 | 699  | 2152 | 0.44 | 6   | 137 | 220 | 363 | 3  | 3    | 700  | 2    | SW  |
| H.151K | ML  | 19.4097 | -155.7448 | 2174 | 9.85  | 5.02 | 15.76 | 696  | 2136 | 0.44 | 7   | 144 | 209 | 360 | 5  | 3    | 700  | 2    | SW  |
| H.152K | ML  | 19.3951 | -155.7267 | 2438 | 8.99  | 4.29 | 14.71 | 724  | 1563 | 0.44 | 0   | 17  | 369 | 386 | 3  | 3    | 700  | 1    | SS  |
| H.153K | ML  | 19.4078 | -155.7316 | 2334 | 9.33  | 4.58 | 15.13 | 698  | 1464 | 0.48 | 11  | 43  | 292 | 345 | 3  | 3    | 700  | 1    | SW  |
| H.154K | ML  | 19.4082 | -155.7354 | 2293 | 9.49  | 4.71 | 15.32 | 699  | 1831 | 0.38 | 8   | 77  | 254 | 339 | 3  | 3    | 700  | 1    | SW  |
| H.2019 | ML  | 19.4965 | -155.3850 | 2062 | 10.30 | 5.56 | 15.95 | 1661 | 1776 | 0.94 | 2   | 113 | 539 | 654 | 3  | 3    | 400  | 0    | SS  |
| H.2020 | ML  | 19.4954 | -155.3851 | 2054 | 10.30 | 5.56 | 15.95 | 1661 | 1776 | 0.94 | 2   | 113 | 539 | 654 | 3  | 3    | 400  | 0    | SS  |
| H.2021 | ML  | 19.4881 | -155.3853 | 1993 | 10.85 | 6.01 | 16.33 | 1662 | 2312 | 0.72 | 32  | 268 | 370 | 669 | 3  | 3    | 400  | 0    | SS  |
| H.2022 | ML  | 19.4876 | -155.3827 | 1953 | 11.02 | 6.34 | 16.61 | 1688 | 2414 | 0.70 | 131 | 287 | 280 | 698 | 5  | 3    | 400  | 0    | SS  |
| H.2025 | ML  | 19.4736 | -155.3611 | 1675 | 12.76 | 8.14 | 18.11 | 1737 | 2230 | 0.78 | 7   | 258 | 444 | 709 | 3  | 3    | 400  | 0    | SS  |
| H.2149 | ML  | 19.4780 | -155.3744 | 1804 | 12.05 | 7.45 | 17.53 | 1711 | 2420 | 0.71 | 48  | 388 | 283 | 719 | 5  | 3    | 400  | 2    | SS  |
| H.2171 | ML  | 19.2398 | -155.6137 | 1882 | 11.60 | 6.91 | 17.15 | 2193 | 2471 | 0.89 | 24  | 339 | 271 | 634 | 3  | 3    | 400  | 2    | WF  |
| H.2172 | ML  | 19.2390 | -155.6123 | 1869 | 11.67 | 6.98 | 17.21 | 2205 | 2342 | 0.94 | 26  | 334 | 267 | 627 | 3  | 3    | 400  | 2    | WF  |
| H.2173 | ML  | 19.3420 | -155.5321 | 2204 | 9.65  | 4.76 | 15.27 | 1735 | 1958 | 0.89 | 10  | 125 | 419 | 554 | 2  | 3    | 400  | 1    | SS  |

| Site    | Vol | Lat     | Long      | EL   | MAT   | Tmin | Tmax  | MAP  | PET  | AI   | TR | WCE | SE  | ET  | SA | Lith | Size | Tree | Com |
|---------|-----|---------|-----------|------|-------|------|-------|------|------|------|----|-----|-----|-----|----|------|------|------|-----|
| H.2174  | ML  | 19.3163 | -155.5680 | 2247 | 9.53  | 4.70 | 15.20 | 1716 | 1896 | 0.91 | 9  | 97  | 464 | 570 | 3  | 3    | 400  | 2    | SS  |
| H.2175  | ML  | 19.2613 | -155.5957 | 1930 | 11.11 | 6.39 | 16.75 | 2087 | 1982 | 1.05 | 23 | 194 | 391 | 608 | 6  | 5    | 400  | 2    | SS  |
| H.2176  | ML  | 19.2558 | -155.5955 | 1907 | 11.52 | 6.64 | 16.95 | 2163 | 2226 | 0.97 | 30 | 332 | 242 | 603 | 2  | 3    | 400  | 2    | WF  |
| H.2177  | ML  | 19.2474 | -155.6054 | 1892 | 11.60 | 6.75 | 17.03 | 2178 | 2298 | 0.95 | 15 | 282 | 304 | 601 | 3  | 3    | 400  | 2    | WF  |
| H.2178  | ML  | 19.2174 | -155.6373 | 1830 | 11.95 | 7.29 | 17.47 | 2265 | 2504 | 0.90 | 18 | 328 | 328 | 673 | 6  | 5    | 400  | 2    | WF  |
| H.2195  | ML  | 19.4677 | -155.3786 | 1740 | 12.33 | 7.88 | 17.91 | 1657 | 1820 | 0.91 | 2  | 164 | 509 | 674 | 4  | 3    | 400  | 1    | SW  |
| H.2196  | ML  | 19.4641 | -155.3815 | 1739 | 12.26 | 7.66 | 17.73 | 1628 | 1913 | 0.85 | 11 | 228 | 411 | 649 | 2  | 3    | 400  | 0    | SS  |
| H.2197  | ML  | 19.4617 | -155.3828 | 1726 | 12.47 | 7.88 | 17.92 | 1624 | 2218 | 0.73 | 11 | 285 | 399 | 695 | 3  | 3    | 400  | 0    | SS  |
| H.2198  | ML  | 19.4652 | -155.3753 | 1698 | 12.67 | 8.10 | 18.10 | 1656 | 2353 | 0.70 | 8  | 286 | 392 | 686 | 4  | 3    | 400  | 0    | SW  |
| H.2252  | ML  | 19.2320 | -155.6496 | 1853 | 11.73 | 7.03 | 17.24 | 2215 | 2439 | 0.91 | 19 | 321 | 304 | 644 | 3  | 3    | 400  | 0    | WF  |
| H.2253  | ML  | 19.2730 | -155.5779 | 1943 | 11.10 | 6.38 | 16.75 | 2152 | 2264 | 0.95 | 28 | 313 | 262 | 602 | 6  | 5    | 400  | 0    | SS  |
| H.2254  | ML  | 19.2777 | -155.5725 | 1957 | 10.95 | 6.23 | 16.61 | 2156 | 2162 | 1.00 | 29 | 247 | 299 | 575 | 3  | 3    | 400  | 1    | SS  |
| H.2255  | ML  | 19.2894 | -155.5562 | 1937 | 11.24 | 6.54 | 16.84 | 2147 | 2067 | 1.04 | 27 | 290 | 263 | 580 | 6  | 5    | 400  | 2    | WF  |
| H.2281  | ML  | 19.2468 | -155.6016 | 1870 | 11.61 | 7.03 | 17.26 | 2189 | 2276 | 0.96 | 29 | 339 | 243 | 611 | 3  | 3    | 400  | 2    | WF  |
| H.2282  | ML  | 19.2508 | -155.5953 | 1873 | 11.69 | 6.94 | 17.19 | 2199 | 2233 | 0.98 | 29 | 327 | 255 | 610 | 2  | 3    | 400  | 2    | WF  |
| H.2292  | ML  | 19.4047 | -155.7429 | 2210 | 9.73  | 4.88 | 15.56 | 703  | 2296 | 0.31 | 4  | 116 | 264 | 384 | 4  | 3    | 400  | 1    | SW  |
| H.2293  | ML  | 19.4082 | -155.7429 | 2198 | 9.75  | 4.93 | 15.63 | 699  | 2094 | 0.33 | 6  | 123 | 226 | 355 | 5  | 3    | 400  | 0    | SW  |
| H.SS.1  | ML  | 19.4896 | -155.4117 | 2271 | 9.35  | 4.60 | 15.01 | 1221 | 1735 | 0.70 | 3  | 63  | 469 | 535 | 3  | 3    | 1000 | 0    | SS  |
| H.SS.10 | ML  | 19.3109 | -155.5457 | 2029 | 10.48 | 5.70 | 16.14 | 1914 | 1445 | 1.32 | 4  | 106 | 452 | 561 | 2  | 3    | 1000 | 2    | SS  |
| H.SS.12 | ML  | 19.2427 | -155.6535 | 2033 | 10.50 | 5.75 | 16.24 | 1947 | 1750 | 1.11 | 2  | 109 | 586 | 696 | 2  | 3    | 1000 | 0    | SS  |
| H.SS.13 | ML  | 19.2633 | -155.6355 | 2127 | 9.93  | 4.97 | 15.62 | 1872 | 1701 | 1.10 | 1  | 74  | 567 | 641 | 3  | 3    | 1000 | 0    | SS  |
| H.SS.14 | ML  | 19.2447 | -155.7090 | 2183 | 9.74  | 4.92 | 15.53 | 1422 | 2055 | 0.69 | 1  | 77  | 616 | 693 | 3  | 3    | 1000 | 0    | SS  |
| H.SS.15 | ML  | 19.4062 | -155.7423 | 2212 | 9.73  | 4.91 | 15.61 | 703  | 2296 | 0.31 | 4  | 116 | 264 | 384 | 3  | 3    | 1000 | 1    | SW  |
| H.SS.16 | ML  | 19.4849 | -155.4067 | 2193 | 9.58  | 4.79 | 15.29 | 1334 | 1721 | 0.77 | 3  | 82  | 476 | 560 | 3  | 3    | 1000 | 0    | SS  |
| H.SS.17 | ML  | 19.5192 | -155.4125 | 2491 | 8.69  | 4.05 | 14.20 | 1059 | 1892 | 0.56 | 1  | 34  | 487 | 521 | 5  | 3    | 1000 | 0    | SS  |
| H.SS.18 | ML  | 19.4904 | -155.3920 | 2104 | 10.14 | 5.22 | 15.69 | 1566 | 1670 | 0.94 | 1  | 88  | 545 | 634 | 3  | 3    | 1000 | 0    | SS  |
| H.SS.19 | ML  | 19.3317 | -155.5506 | 2267 | 9.43  | 4.65 | 15.13 | 1666 | 1628 | 1.02 | 2  | 67  | 499 | 567 | 2  | 3    | 1000 | 0    | SS  |
| H.SS.2  | ML  | 19.4674 | -155.4287 | 2206 | 9.55  | 4.75 | 15.24 | 1241 | 1649 | 0.75 | 0  | 50  | 503 | 553 | 2  | 3    | 1000 | 0    | SS  |
| H.SS.20 | ML  | 19.2981 | -155.5561 | 2026 | 10.58 | 5.82 | 16.24 | 2014 | 2172 | 0.93 | 20 | 232 | 334 | 586 | 3  | 3    | 1000 | 2    | SS  |
| H.SS.21 | ML  | 19.2961 | -155.5742 | 2149 | 9.82  | 4.99 | 15.60 | 1907 | 1624 | 1.17 | 4  | 94  | 497 | 595 | 3  | 3    | 1000 | 2    | SS  |
| H.SS.22 | ML  | 19.3023 | -155.5607 | 2091 | 10.20 | 5.41 | 15.92 | 1921 | 1631 | 1.18 | 10 | 125 | 430 | 565 | 3  | 3    | 1000 | 1    | SS  |
| H.SS.23 | ML  | 19.2704 | -155.6213 | 2112 | 9.97  | 5.14 | 15.75 | 1845 | 1741 | 1.06 | 2  | 94  | 564 | 659 | 2  | 3    | 1000 | 0    | SS  |
| H.SS.24 | ML  | 19.2670 | -155.6006 | 2017 | 10.67 | 5.90 | 16.35 | 2013 | 1537 | 1.31 | 2  | 112 | 507 | 621 | 2  | 3    | 1000 | 2    | SS  |
| H.SS.25 | ML  | 19.3290 | -155.5273 | 2029 | 10.58 | 5.81 | 16.21 | 1916 | 1962 | 0.98 | 22 | 226 | 297 | 544 | 2  | 3    | 1000 | 2    | SS  |
| H.SS.27 | ML  | 19.2656 | -155.6386 | 2151 | 9.75  | 4.93 | 15.55 | 1820 | 1853 | 0.98 | 1  | 72  | 640 | 713 | 3  | 3    | 1000 | 0    | SS  |
| H.SS.28 | ML  | 19.2430 | -155.6548 | 2040 | 10.50 | 5.71 | 16.22 | 1947 | 1750 | 1.11 | 2  | 109 | 586 | 696 | 2  | 3    | 1000 | 0    | SS  |
| H.SS.29 | ML  | 19.2349 | -155.7113 | 2099 | 10.16 | 5.36 | 15.93 | 1416 | 1931 | 0.73 | 0  | 74  | 628 | 702 | 3  | 3    | 1000 | 0    | SS  |
| H.SS.3  | ML  | 19.5134 | -155.4038 | 2373 | 8.97  | 4.29 | 14.55 | 1187 | 1837 | 0.65 | 2  | 52  | 481 | 534 | 5  | 3    | 1000 | 1    | SS  |
| H.SS.30 | ML  | 19.3945 | -155.7398 | 2259 | 9.56  | 4.77 | 15.40 | 724  | 1658 | 0.44 | 6  | 69  | 294 | 369 | 3  | 3    | 1000 | 2    | SW  |
| H.SS.4  | ML  | 19.3265 | -155.5521 | 2222 | 9.61  | 4.75 | 15.27 | 1738 | 1590 | 1.09 | 3  | 77  | 484 | 564 | 2  | 3    | 1000 | 2    | SS  |
| H.SS.5  | ML  | 19.2756 | -155.5834 | 2011 | 10.70 | 5.95 | 16.40 | 2076 | 2143 | 0.97 | 18 | 225 | 365 | 608 | 2  | 3    | 1000 | 2    | SS  |
| H.SS.6  | ML  | 19.3140 | -155.5745 | 2268 | 9.46  | 4.68 | 15.18 | 1695 | 1673 | 1.01 | 2  | 67  | 528 | 596 | 3  | 3    | 1000 | 0    | SS  |

| Site    | Vol | Lat     | Long      | EL   | MAT   | Tmin | Tmax  | MAP  | PET  | AI   | TR  | WCE | SE  | ET  | SA | Lith | Size | Tree | Com |
|---------|-----|---------|-----------|------|-------|------|-------|------|------|------|-----|-----|-----|-----|----|------|------|------|-----|
| H.SS.7  | ML  | 19.3102 | -155.5654 | 2188 | 9.73  | 4.90 | 15.48 | 1805 | 1870 | 0.97 | 15  | 127 | 413 | 555 | 3  | 3    | 1000 | 2    | SS  |
| H.SS.8  | ML  | 19.3084 | -155.5602 | 2138 | 9.97  | 5.02 | 15.60 | 1864 | 1669 | 1.12 | 3   | 100 | 486 | 588 | 3  | 3    | 1000 | 2    | SS  |
| H.SS.9  | ML  | 19.3384 | -155.5542 | 2361 | 9.19  | 4.45 | 14.84 | 1568 | 1748 | 0.90 | 1   | 55  | 519 | 575 | 3  | 3    | 1000 | 0    | SS  |
| H.WF.1  | ML  | 19.2553 | -155.5919 | 1877 | 11.58 | 6.90 | 17.16 | 2179 | 2179 | 1.00 | 31  | 334 | 235 | 600 | 6  | 5    | 1000 | 2    | WF  |
| H.WF.16 | ML  | 19.2655 | -155.5799 | 1877 | 11.65 | 6.80 | 17.08 | 2207 | 2132 | 1.04 | 30  | 333 | 234 | 596 | 2  | 3    | 1000 | 2    | WF  |
| H.WF.17 | ML  | 19.2452 | -155.6042 | 1870 | 11.79 | 6.91 | 17.16 | 2207 | 2225 | 0.99 | 30  | 346 | 235 | 611 | 3  | 3    | 1000 | 2    | WF  |
| H.WF.19 | ML  | 19.2402 | -155.6080 | 1860 | 11.82 | 7.15 | 17.35 | 2227 | 2302 | 0.97 | 32  | 358 | 235 | 625 | 3  | 3    | 1000 | 2    | WF  |
| H.WF.2  | ML  | 19.2514 | -155.6002 | 1899 | 11.45 | 6.75 | 17.03 | 2160 | 2248 | 0.96 | 26  | 309 | 277 | 611 | 3  | 3    | 1000 | 2    | WF  |
| H.WF.20 | ML  | 19.2447 | -155.6088 | 1878 | 11.55 | 6.85 | 17.10 | 2177 | 2268 | 0.96 | 22  | 297 | 305 | 623 | 3  | 3    | 1000 | 2    | SS  |
| H.WF.3  | ML  | 19.2434 | -155.6060 | 1848 | 11.72 | 7.03 | 17.26 | 2198 | 2150 | 1.02 | 28  | 322 | 232 | 581 | 3  | 3    | 1000 | 2    | SS  |
| H.WF.4  | ML  | 19.2692 | -155.5784 | 1904 | 11.40 | 6.72 | 17.02 | 2195 | 2142 | 1.02 | 31  | 322 | 237 | 590 | 2  | 3    | 1000 | 2    | WF  |
| H.WF.5  | ML  | 19.2813 | -155.5634 | 1941 | 11.26 | 6.42 | 16.75 | 2232 | 2166 | 1.03 | 31  | 319 | 237 | 588 | 6  | 5    | 1000 | 2    | WF  |
| M.0009  | H   | 20.7315 | -156.1437 | 2453 | 8.50  | 3.79 | 13.51 | 2874 | 1941 | 1.48 | 47  | 21  | 754 | 822 | 6  | 4    | 400  | 0    | SS  |
| M.0013  | H   | 20.7340 | -156.1534 | 2481 | 8.59  | 3.73 | 13.46 | 2391 | 2235 | 1.07 | 8   | 41  | 706 | 755 | 6  | 4    | 400  | 0    | SS  |
| M.0014  | H   | 20.7292 | -156.1505 | 2348 | 9.18  | 3.90 | 13.64 | 2031 | 1814 | 1.12 | 11  | 65  | 580 | 656 | 6  | 4    | 400  | 0    | SS  |
| M.0015  | H   | 20.7264 | -156.1478 | 2245 | 9.17  | 4.26 | 14.11 | 2237 | 1826 | 1.22 | 53  | 108 | 502 | 663 | 4  | 4    | 400  | 0    | SS  |
| M.0016  | H   | 20.7276 | -156.1439 | 2226 | 8.90  | 4.33 | 14.22 | 2773 | 1756 | 1.58 | 5   | 54  | 689 | 748 | 4  | 4    | 400  | 0    | SS  |
| M.0017  | H   | 20.7265 | -156.1433 | 2203 | 9.16  | 4.33 | 14.22 | 2743 | 1715 | 1.60 | 147 | 158 | 395 | 701 | 4  | 4    | 400  | 0    | SS  |
| M.0018  | H   | 20.7254 | -156.1441 | 2191 | 9.20  | 4.38 | 14.23 | 2743 | 2209 | 1.24 | 172 | 182 | 406 | 759 | 4  | 4    | 400  | 0    | SS  |
| M.0019  | H   | 20.7234 | -156.1449 | 2111 | 9.68  | 4.38 | 14.23 | 2430 | 2228 | 1.09 | 141 | 251 | 321 | 712 | 4  | 4    | 400  | 0    | SS  |
| M.0020  | H   | 20.7231 | -156.1437 | 2088 | 9.68  | 4.96 | 14.64 | 2791 | 2146 | 1.30 | 39  | 163 | 567 | 769 | 4  | 4    | 400  | 0    | SS  |
| M.0021  | H   | 20.7164 | -156.1598 | 2028 | 10.32 | 5.46 | 15.42 | 1471 | 1889 | 0.78 | 0   | 36  | 640 | 675 | 4  | 4    | 400  | 0    | SS  |
| M.0022  | H   | 20.7120 | -156.1608 | 2002 | 10.40 | 5.58 | 15.54 | 1547 | 1885 | 0.82 | 3   | 128 | 505 | 636 | 2  | 1    | 400  | 0    | SS  |
| M.0023  | H   | 20.7092 | -156.1598 | 1957 | 10.58 | 5.80 | 15.73 | 1590 | 1856 | 0.86 | 2   | 132 | 525 | 658 | 2  | 1    | 400  | 0    | SS  |
| M.0024  | H   | 20.7082 | -156.1581 | 1897 | 10.83 | 6.10 | 15.93 | 1664 | 1900 | 0.88 | 11  | 184 | 457 | 652 | 4  | 1    | 400  | 0    | SS  |
| M.0025  | H   | 20.7128 | -156.1572 | 1950 | 10.64 | 5.91 | 15.70 | 1625 | 1845 | 0.88 | 20  | 179 | 451 | 650 | 2  | 2    | 400  | 0    | SS  |
| M.0026  | H   | 20.7172 | -156.1474 | 1960 | 10.33 | 5.63 | 15.17 | 2135 | 2123 | 1.01 | 134 | 337 | 226 | 696 | 4  | 1    | 400  | 0    | SS  |
| M.0027  | H   | 20.7193 | -156.1642 | 2068 | 10.18 | 5.24 | 15.28 | 1437 | 1716 | 0.84 | 0   | 29  | 580 | 609 | 2  | 1    | 400  | 0    | SS  |
| M.0028  | H   | 20.7180 | -156.1588 | 2059 | 9.95  | 5.05 | 15.04 | 1472 | 1880 | 0.78 | 15  | 122 | 479 | 616 | 4  | 4    | 400  | 0    | SS  |
| M.0062  | H   | 20.7225 | -156.1507 | 2023 | 10.27 | 5.10 | 14.87 | 1610 | 1755 | 0.92 | 50  | 175 | 427 | 652 | 4  | 1    | 400  | 0    | SS  |
| M.0063  | H   | 20.7249 | -156.1929 | 2216 | 9.50  | 4.65 | 15.05 | 1315 | 1869 | 0.70 | 0   | 40  | 544 | 583 | 6  | 4    | 400  | 0    | SS  |
| M.0064  | H   | 20.7407 | -156.1884 | 2047 | 10.30 | 5.39 | 15.56 | 1846 | 1406 | 1.31 | 32  | 123 | 375 | 529 | 1  | 4    | 400  | 0    | SS  |
| M.0084  | H   | 20.7045 | -156.1575 | 1784 | 11.74 | 7.15 | 16.81 | 1858 | 1848 | 1.01 | 69  | 279 | 341 | 689 | 4  | 1    | 400  | 0    | SS  |
| M.0085  | H   | 20.6995 | -156.1615 | 1712 | 12.30 | 7.70 | 17.38 | 1735 | 1631 | 1.06 | 79  | 272 | 255 | 606 | 4  | 1    | 400  | 0    | SS  |
| M.0086  | H   | 20.6984 | -156.1594 | 1658 | 12.70 | 8.15 | 17.75 | 1856 | 1530 | 1.21 | 43  | 212 | 357 | 611 | 4  | 1    | 400  | 0    | SS  |
| M.0087  | H   | 20.6973 | -156.1551 | 1615 | 12.85 | 8.35 | 17.87 | 2068 | 1862 | 1.11 | 21  | 285 | 392 | 697 | 2  | 1    | 400  | 0    | SS  |
| M.0129  | H   | 20.7058 | -156.1845 | 2261 | 9.46  | 4.67 | 15.07 | 1288 | 1720 | 0.75 | 1   | 53  | 436 | 489 | 8  | 3    | 400  | 0    | SS  |
| M.0130  | H   | 20.7063 | -156.1930 | 2224 | 9.49  | 4.71 | 15.18 | 1248 | 1701 | 0.73 | 0   | 38  | 479 | 516 | 8  | 2    | 400  | 0    | SS  |
| M.0131  | H   | 20.7034 | -156.1969 | 2242 | 9.13  | 4.73 | 15.22 | 1254 | 2178 | 0.58 | 0   | 43  | 550 | 593 | 1  | 4    | 400  | 0    | SS  |
| M.0145  | H   | 20.7184 | -156.1342 | 1957 | 10.22 | 5.83 | 15.18 | 3958 | 2457 | 1.61 | 36  | 236 | 535 | 807 | 8  | 3    | 400  | 2    | WF  |
| M.0146  | H   | 20.7174 | -156.1288 | 1841 | 10.65 | 6.37 | 15.60 | 4363 | 2142 | 2.04 | 68  | 412 | 212 | 691 | 6  | 1    | 400  | 2    | WF  |
| M.0147  | H   | 20.7276 | -156.1278 | 2098 | 9.19  | 5.23 | 14.98 | 4832 | 2054 | 2.35 | 62  | 67  | 808 | 937 | 8  | 3    | 400  | 2    | WF  |

| Site    | Vol | Lat     | Long      | EL   | MAT   | Tmin | Tmax  | MAP   | PET  | AI   | TR  | WCE | SE  | ET  | SA | Lith | Size | Tree | Com |
|---------|-----|---------|-----------|------|-------|------|-------|-------|------|------|-----|-----|-----|-----|----|------|------|------|-----|
| M.0148  | H   | 20.7248 | -156.1296 | 1976 | 10.11 | 5.72 | 15.33 | 4441  | 2286 | 1.94 | 55  | 378 | 253 | 686 | 8  | 3    | 400  | 2    | WF  |
| M.0149  | H   | 20.7238 | -156.1282 | 1931 | 10.26 | 5.92 | 15.47 | 4712  | 2217 | 2.13 | 58  | 371 | 275 | 704 | 8  | 3    | 400  | 2    | WF  |
| M.0150  | H   | 20.7260 | -156.1331 | 2078 | 9.26  | 4.66 | 14.55 | 3924  | 2264 | 1.73 | 51  | 158 | 585 | 793 | 6  | 4    | 400  | 2    | WF  |
| M.0152  | H   | 20.6938 | -156.1551 | 1531 | 13.55 | 9.09 | 18.53 | 2110  | 1673 | 1.26 | 133 | 372 | 237 | 742 | 2  | 1    | 400  | 0    | SS  |
| M.0157  | H   | 20.7280 | -156.0913 | 1665 | 11.41 | 7.61 | 16.51 | 10208 | 2313 | 4.41 | 56  | 449 | 277 | 781 | 7  | 4    | 400  | 0    | SS  |
| M.0158  | H   | 20.7304 | -156.0948 | 1668 | 11.25 | 7.62 | 16.61 | 9815  | 2178 | 4.51 | 135 | 535 | 67  | 736 | 1  | 4    | 400  | 0    | SS  |
| M.0159  | H   | 20.7307 | -156.0959 | 1678 | 11.50 | 7.62 | 16.61 | 9798  | 1999 | 4.90 | 133 | 515 | 74  | 721 | 8  | 3    | 400  | 0    | WF  |
| M.0160  | H   | 20.7357 | -156.1037 | 1850 | 10.55 | 6.45 | 15.82 | 8673  | 2275 | 3.81 | 155 | 470 | 85  | 710 | 5  | 4    | 400  | 2    | WF  |
| M.0161  | H   | 20.7341 | -156.0996 | 1726 | 11.35 | 7.38 | 16.51 | 9253  | 2039 | 4.54 | 160 | 528 | 37  | 724 | 5  | 1    | 400  | 2    | WF  |
| M.0162  | H   | 20.7106 | -156.1117 | 1504 | 12.41 | 8.53 | 17.17 | 6130  | 2035 | 3.01 | 174 | 561 | 87  | 822 | 6  | 1    | 400  | 2    | WF  |
| M.0163  | H   | 20.7097 | -156.1121 | 1511 | 12.41 | 8.61 | 17.24 | 6130  | 2035 | 3.01 | 174 | 561 | 87  | 822 | 6  | 1    | 400  | 2    | WF  |
| M.0180  | H   | 20.6894 | -156.1257 | 1553 | 13.15 | 8.90 | 18.01 | 3588  | 2765 | 1.30 | 110 | 599 | 233 | 942 | 8  | 3    | 400  | 2    | SS  |
| M.0181  | H   | 20.6901 | -156.1272 | 1589 | 12.47 | 8.15 | 17.33 | 3539  | 2730 | 1.30 | 115 | 564 | 233 | 911 | 8  | 3    | 400  | 2    | WF  |
| M.SS.11 | H   | 20.7179 | -156.1533 | 2005 | 10.25 | 5.44 | 15.25 | 1608  | 1810 | 0.89 | 19  | 132 | 513 | 664 | 2  | 2    | 1000 | 0    | SS  |
| M.SS.13 | H   | 20.7236 | -156.1899 | 2308 | 9.33  | 4.51 | 14.82 | 1327  | 2022 | 0.66 | 1   | 64  | 516 | 580 | 6  | 4    | 1000 | 0    | SS  |
| M.SS.14 | H   | 20.7108 | -156.1694 | 2099 | 9.87  | 4.98 | 15.18 | 1387  | 1914 | 0.72 | 6   | 110 | 465 | 581 | 4  | 1    | 1000 | 0    | SS  |
| M.SS.17 | H   | 20.7200 | -156.1466 | 2032 | 9.99  | 5.22 | 14.87 | 2059  | 2113 | 0.97 | 118 | 283 | 273 | 674 | 4  | 1    | 1000 | 0    | SS  |
| M.SS.19 | H   | 20.7280 | -156.1813 | 2450 | 8.81  | 3.98 | 13.94 | 1467  | 1870 | 0.78 | 0   | 22  | 536 | 557 | 5  | 1    | 1000 | 0    | SS  |
| M.SS.21 | H   | 20.7253 | -156.1431 | 2177 | 9.20  | 4.39 | 14.24 | 2743  | 2209 | 1.24 | 172 | 182 | 406 | 759 | 4  | 4    | 1000 | 0    | SS  |
| M.SS.23 | H   | 20.6990 | -156.1939 | 2319 | 9.11  | 4.41 | 14.73 | 1277  | 2020 | 0.63 | 0   | 42  | 481 | 523 | 8  | 3    | 1000 | 0    | SS  |
| M.SS.26 | H   | 20.7076 | -156.1351 | 2233 | 8.39  | 3.89 | 13.29 | 3745  | 3520 | 1.06 | 53  | 93  | 702 | 848 | 8  | 3    | 1000 | 0    | SS  |
| M.SS.30 | H   | 20.7315 | -156.1413 | 2436 | 8.49  | 3.82 | 13.55 | 3109  | 1977 | 1.57 | 49  | 24  | 776 | 848 | 6  | 4    | 1000 | 0    | SS  |
| M.SS.6  | H   | 20.7000 | -156.1764 | 2437 | 8.83  | 4.14 | 14.24 | 1377  | 2178 | 0.63 | 8   | 50  | 456 | 514 | 8  | 3    | 1000 | 0    | SS  |
| M.SS.8  | H   | 20.7361 | -156.1423 | 2340 | 8.87  | 4.11 | 14.01 | 3308  | 1975 | 1.68 | 25  | 28  | 800 | 852 | 6  | 4    | 1000 | 0    | SS  |
| M.WF.10 | H   | 20.7317 | -156.1136 | 2021 | 9.65  | 5.37 | 15.04 | 6969  | 2130 | 3.27 | 38  | 131 | 747 | 916 | 8  | 3    | 1000 | 2    | WF  |
| M.WF.11 | H   | 20.7065 | -156.1142 | 1527 | 12.43 | 8.50 | 17.17 | 5556  | 1879 | 2.96 | 161 | 493 | 149 | 803 | 6  | 1    | 1000 | 2    | WF  |
| M.WF.12 | H   | 20.7062 | -156.1126 | 1511 | 12.43 | 8.50 | 17.17 | 5556  | 1879 | 2.96 | 161 | 493 | 149 | 803 | 6  | 1    | 1000 | 2    | WF  |
| M.WF.16 | H   | 20.7132 | -156.1231 | 1663 | 11.58 | 7.45 | 16.30 | 4924  | 1966 | 2.50 | 155 | 458 | 178 | 791 | 6  | 1    | 1000 | 2    | WF  |
| M.WF.17 | H   | 20.6933 | -156.1111 | 1585 | 12.17 | 8.11 | 17.07 | 4913  | 2638 | 1.86 | 121 | 582 | 187 | 889 | 8  | 3    | 1000 | 2    | WF  |
| M.WF.24 | H   | 20.6946 | -156.1120 | 1627 | 11.89 | 7.83 | 16.78 | 5055  | 2579 | 1.96 | 130 | 565 | 180 | 875 | 8  | 3    | 1000 | 2    | WF  |
| M.WF.29 | H   | 20.6921 | -156.1104 | 1566 | 12.33 | 8.11 | 17.07 | 5143  | 2524 | 2.04 | 124 | 581 | 177 | 882 | 8  | 3    | 1000 | 2    | WF  |
| M.WF.8  | H   | 20.7293 | -156.0946 | 1708 | 11.25 | 7.37 | 16.37 | 9815  | 2178 | 4.51 | 135 | 535 | 67  | 736 | 6  | 4    | 1000 | 2    | WF  |

## Supplement References –

- Ainsworth, A.; Berkowitz, P.; Jacobi, J.D.; Loh, R.K.; Kozar, K. Focal terrestrial plant communities monitoring protocol: Pacific Island Network. Natural Resource Report NPS/PACN/NRR—2011/410. National Park Service, Fort Collins, Colorado, USA, 2011.
- Aplet, G.H.; Vitousek, P.M. An age-altitude matrix analysis of Hawaiian rain-forest succession. *J. Ecol.* **1994**, *82*, 137-147.
- Giambelluca, T.W.; Chen, Q.; Frazier, A.G.; Price, J.P.; Chen, Y.-L.; Chu, P.-S.; Eischeid, J.K.; Departe, D.M. Online rainfall atlas of Hawaii. *Bulletin of American Meteorological Society* **2013**, *94*, 313-316.
- Giambelluca, T.W.; Shuai, X.; Barnes, M.L.; Alliss, R.J.; Longman, R.J.; Miura, T.; Chen, Q.; Frazier, A.G.; Mudd, R.G.; Cuo, L.; Businger, A.D. Evapotranspiration of Hawaii. Final report submitted to the U.S. Army Corp of Engineers - Honolulu District, and the Commission on Water Resource Management, State of Hawaii, USA, 2014.
- Green, K.; Hall, M.; Lopez, C.; Ainsworth, A.; Selvig, M.; Akamine, K.; Fugate, S.; Schulz, K.; Benitez, D.; Wasser, M.; Kudray, G. Vegetation mapping inventory project: Hawaii Volcanoes National Park. Fort Collins, CO, USA: National Park Service; 2015a; p.316. Report No. NPS/PACN/NRR-2015/966.
- Green, K.; Schulz, K.; Lopez, C.; Ainsworth, A.; Selvig, M.; Akamine, K.; Meston, C.; Mallinson, J.W.; Urbanski, E.; Fugate, S.; Hall, M.; Kudray, G. Vegetation mapping inventory project: Haleakala National Park. Fort Collins, CO, USA: National Park Service; 2015b; p.297. Report No. NPS/PACN/NRR-2015/986.
- Litton, C.M.; Kauffman, J.B. Allometric models for predicting aboveground biomass in two widespread plants in Hawaii. *Biotropica*, **2008**, *40*, 313-320.
- Mueller-Dombois, D.; Ellenberg, H. *Aims and Methods of Vegetation Ecology*; Wiley & Sons: New York, USA, 1974.
- Palmer, D.D. *Hawaii's Ferns and Fern Allies*; University of Hawaii Press: Honolulu, Hawaii, USA, 2003.
- Wagner, W.L.; Herbst, D.R.; Sohmer, S.H. *Manual of the Flowering Plants of Hawaii*, 2nd ed; University of Hawaii Press and Bishop Museum Press: Honolulu, Hawaii, USA, 1999.
- Wagner, W.L.; Herbst, D.R.; Kahn, N.; Flynn, T. *Hawaiian Vascular Plant Updates: a supplement to the manual of flowering plants of Hawaii and Hawaii's ferns and fern allies*. University of Hawaii Press: Honolulu, Hawaii, USA, 2012.
